# Supplementary material
Source: publisher site journal article supplement (https://www.dovepress.com/article/499943)
Supplement: Supplementary file 1 [file get_supplementary_file.php]

**Supplementary table S1. Knowledge, attitude and practice**

| **Knowledge** | **N（%）** | | |
| --- | --- | --- | --- |
| **Very familiar** | **Heard of it** | **Unclear** |
| 1. Hypotension during hemodialysis refers to a decrease in systolic blood pressure of ≥20 mmHg (1 mmHg=0.133 kPa) or a decrease in mean arterial pressure of more than 10 mmHg during hemodialysis, accompanied by symptoms of hypotension. | 136 (66.34) | 54 (26.34) | 15 (7.32) |
| 1. High-risk groups for hypotension during hemodialysis include patients with stage 5 chronic renal insufficiency and end-stage renal disease (ESRD) who undergo regular hemodialysis treatment. | 137 (66.83) | 55 (26.83) | 13 (6.34) |
| 1. The occurrence of hypotension during hemodialysis is related to the patient's age, gender, and dialysis age. As age and dialysis age increase, the incidence of intradialytic hypotension increases. | 129 (62.93) | 59 (28.78) | 17 (8.29) |
| 1. Symptoms related to hypotension during hemodialysis including drowsiness, lethargy, sighing, irritability, headache, muscle spasm, difficulty breathing, chest and back pain, abdominal pain, nausea and vomiting, etc. | 151 (73.66) | 42 (20.49) | 12 (5.85) |
| 1. Patients with diabetes, cardiovascular disease, and autonomic neuropathy are at a higher risk of developing hypotension during hemodialysis. | 139 (67.8) | 52 (25.37) | 14 (6.83) |
| 1. The capital of china is shanghai. |  |  |  |
| 1. Under dialysisrecurrent hypotension may cause insufficient blood perfusion in various organs, leading to complications in arteriovenous fistulas, residual kidneys, mesenteric blood vessels, heart and brain and other important organs, and even increase mortality. | 137 (66.83) | 59 (28.78) | 9 (4.39) |
| 1. Hypotension during dialysis can lead to inadequate perfusion of the central nervous system, which may result in pathological manifestations such as cerebral ischemia and frontal lobe atrophy. | 109 (53.17) | 73 (35.61) | 23 (11.22) |
| 1. Preventive measures for hypotension during hemodialysis include: Do not take or reduce the dosage of antihypertensive medication on the day of dialysis, limit eating during dialysis, improve the patient's nutritional status, and try to use drugs such as levocarnitine and midodrine HCI. | 138 (67.32) | 54 (26.34) | 13 (6.34) |
| 1. When necessary, high sugar or hypertonic liquids (such as mannitol, etc.) may be administered, or intravenous infusion of human albumin or other artificial colloids (such as hydroxyethyl starch) may be used. Additionally, traditional Chinese medicine Shengmai Yiyi Granules may be employed to strengthen the pulse and firm the exterior. Crystalloid fluids remain the preferred choice, with colloidal fluids used when necessary, following the principle of “crystalloid first, colloid later” for fluid replacement. | 130 (63.41) | 63 (30.73) | 12 (5.85) |
| 1. The straight leg raising test can be considered as a treatment option for hypotension during dialysis. | 83 (40.49) | 83 (40.49) | 39 (19.02) |

| **Attitude** | **N (%)** | | | | |
| --- | --- | --- | --- | --- | --- |
| **Strongly agree** | **Agree** | **Neutral** | **Disagree** | **Strongly disagree** |
| 1. I think the prevention of hypotension during hemodialysis is crucial, and patients with high-risk risk factors should pay close attention (p). | 171 (83.41) | 29 (14.15) | 4 (1.95) | 1 (0.49) |  |
| 1. Hypotension during hemodialysis can cause fatal complications and should not be taken lightly (p). | 178 (86.83) | 25 (12.2) | 2 (0.98) |  |  |
| 1. I think that current medical staffs do not pay enough attention to hypotension during hemodialysis and need to be strengthened (p). | 93 (45.37) | 68 (33.17) | 30 (14.63) | 13 (6.34) | 1 (0.49) |
| 1. I think most kidney patients have weak self-management ability and awareness, and they need the assistance and attention of medical staffs and family members (p). | 149 (72.68) | 46 (22.44) | 10 (4.88) |  |  |
| 1. I think the medical management level of the dialysis medical team is uneven, and further standardized training is urgently needed (p). | 108 (52.68) | 74 (36.1) | 15 (7.32) | 7 (3.41) | 1 (0.49) |
| 1. I believe that current training and guidance are adequate to support health care providers in effectively managing hypotension in dialysis patients (p). | 96 (46.83) | 75 (36.59) | 29 (14.15) | 5 (2.44) |  |
| 1. Assessing the patient's cardiac function and maintaining the patient's cardiac function status are crucial to preventing hypotension during hemodialysis (p). | 146 (71.22) | 54 (26.34) | 5 (2.44) |  |  |
| 1. I am confident that i can properly handle patients with hypotension during hemodialysis (p). | 103 (50.24) | 73 (35.61) | 27 (13.17) | 2 (0.98) |  |
| 1. I am willing to participate in further training to enhance professional knowledge and skills in intradialytic hypotension (p). | 130 (63.41) | 67 (32.68) | 8 (3.9) |  |  |
| 1. I believe that the management of hypotension in dialysis patients requires a team approach, including the involvement of multiple medical professions (p). | 142 (69.27) | 54 (26.34) | 9 (4.39) |  |  |

| **Practice** | **N (%)** | | | | |
| --- | --- | --- | --- | --- | --- |
| **Always** | **Often** | **Sometimes** | **Rarely** | **Never** |
| 1. I can accurately diagnose patients with hypotension during hemodialysis (p). | 67 (32.68) | 97 (47.32) | 27 (13.17) | 9 (4.39) | 5 (2.44) |
| 1. I will actively help high-risk patients to actively prevent the occurrence of hypotension during dialysis (p). | 85 (41.46) | 90 (43.9) | 22 (10.73) | 2 (0.98) | 6 (2.93) |
| 1. When dealing with patients with hypotension during hemodialysis, I will promptly consult and discuss with medical staffs or professional teams from other relevant departments to formulate a treatment plan (p). | 79 (38.54) | 70 (34.15) | 41 (20) | 8 (3.9) | 7 (3.41) |
| 1. When dealing with hypotensive patients on hemodialysis, i will fully comply with existing guideline recommendations (p). | 95 (46.34) | 86 (41.95) | 13 (6.34) | 7 (3.41) | 4 (1.95) |
| 1. I pay attention to and study the latest literature and guideline interpretation on hypotension during hemodialysis (p). | 73 (35.61) | 57 (27.8) | 53 (25.85) | 17 (8.29) | 5 (2.44) |
| 1. I communicate effectively with patients and their families and provide health education to promote the management of intradialytic hypotension (p). | 87 (42.44) | 85 (41.46) | 23 (11.22) | 6 (2.93) | 4 (1.95) |
| 1. I will proactively pay attention to the overall health status of dialysis patients to prevent the occurrence of hypotension (p). | 93 (45.37) | 81 (39.51) | 23 (11.22) | 2 (0.98) | 6 (2.93) |

**Supplementary table S2. Model fit**

| **Model fit index** | **Ref.** | **Measured results** |
| --- | --- | --- |
| **CMIN/DF** | 1-3 excellent, 3-5 good | 3.591 |
| **RMSEA** | < 0.08 good | 0.113 |
| **IFI** | > 0.8 good | 0.899 |
| **TLI** | > 0.8 good | 0.826 |
| **CFI** | > 0.8 good | 0.896 |
